# Supplementary material for: Spatial separation of photogenerated charges on the anisotropic facets of cuprous oxide
Source: Royal Society of Chemistry journal article supplement (doi:10.1039/d3qi00455d), 2023-01-01
Supplement: d3qi00455d1.pdf [file d3qi00455d1.pdf]

## Supporting Information

### **Spatial separation of photogenerated charges on anisotropic facets of cuprous oxide**

Tianhui Su, Chunlei Yang, Fushuang Niu, Yanbo Hua, Qinshang Xu, Ke Hu and  
Liming Zhang\*

Department of Chemistry, *iChEM* (Collaborative Innovation Center of Chemistry for Energy Materials), Shanghai Key Laboratory of Molecular Catalysis and Innovative Materials, Fudan University, Shanghai 200438, China  
Correspondence to: zhanglm@fudan.edu.cn

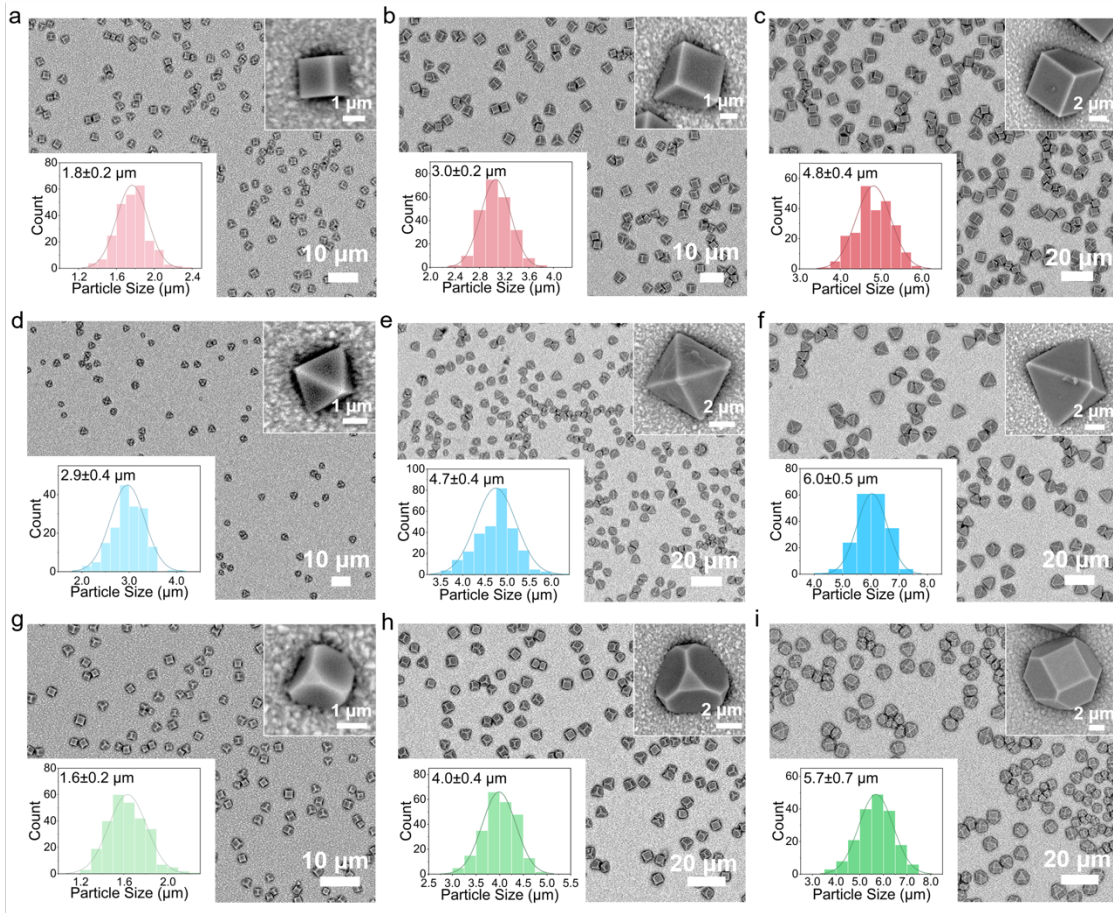

**Figure S1.** Morphology and particle size distribution of as-prepared  $\text{Cu}_2\text{O}$  crystals with different exposed facets. SEM images and particle size distribution of c- $\text{Cu}_2\text{O}$  (a-c), o- $\text{Cu}_2\text{O}$  (d-f) and t- $\text{Cu}_2\text{O}$  (g-i), synthesized under an electrodeposition time of 1 min (a, d, g), 5 min (b, e, h) and 10 min (c, f, i), respectively.

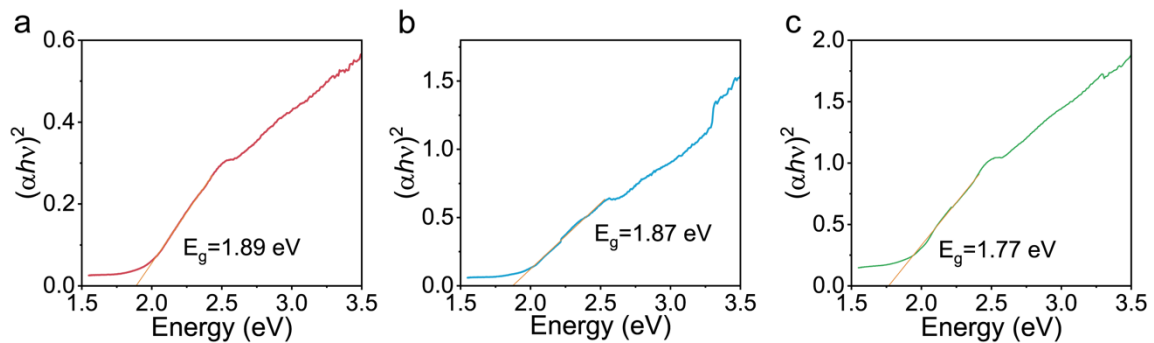

**Figure S2.** Characterization of light absorption properties. Tauc plots of c- $\text{Cu}_2\text{O}$  (a), o- $\text{Cu}_2\text{O}$  (b) and t- $\text{Cu}_2\text{O}$  (c).

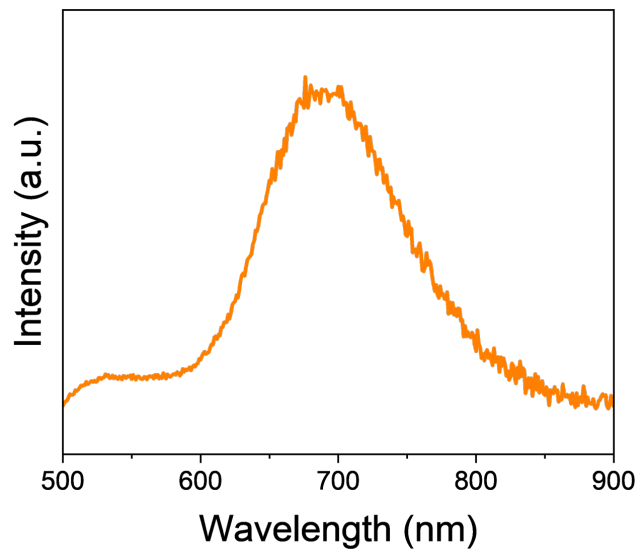

**Figure S3.** Steady state photoluminescence spectrum of as-prepared Cu<sub>2</sub>O.

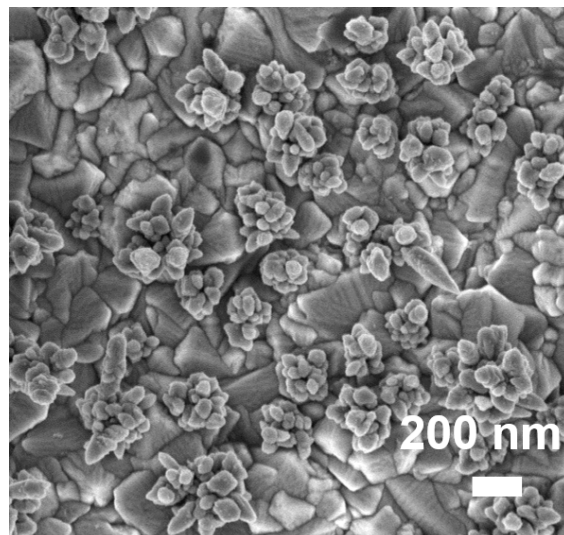

**Figure S4.** The newly formed particles observed on the FTO substrate after reaction in an acid media.

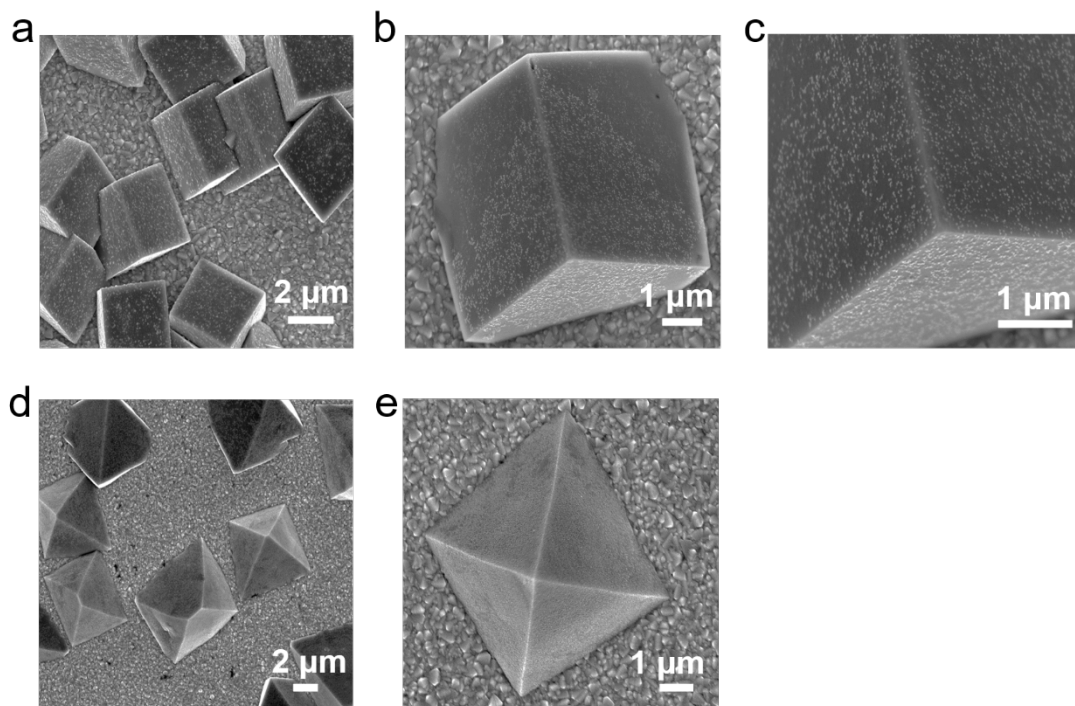

**Figure S5.** Morphology evolution of  $\text{Cu}_2\text{O}$  in a neutral electrolyte. SEM images of c- $\text{Cu}_2\text{O}$  (a-c), o- $\text{Cu}_2\text{O}$  (d-e) after photoelectrocatalysis at 0 V vs. RHE for 3 min in 1 M  $\text{Na}_2\text{SO}_4$ .

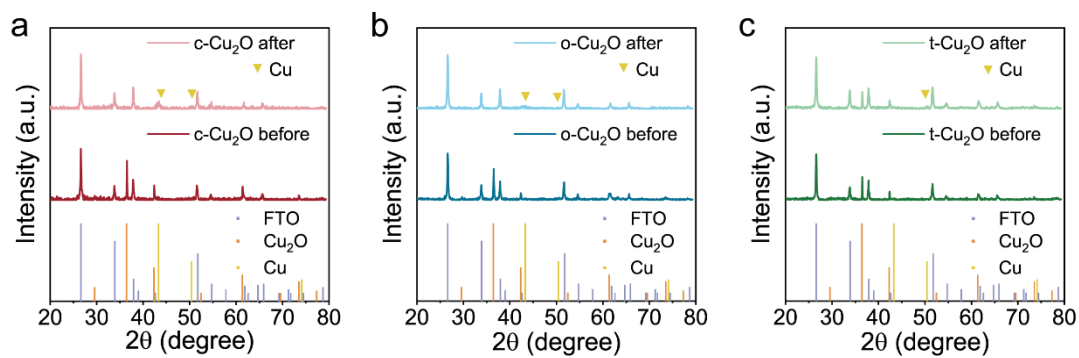

**Figure S6.** Comparison of  $\text{Cu}_2\text{O}$  before and after HER. X-ray diffraction patterns of c- $\text{Cu}_2\text{O}$  (a), o- $\text{Cu}_2\text{O}$  (b) and t- $\text{Cu}_2\text{O}$  (c) before and after HER. Reactions were carried out under 0 V vs. RHE for 30 min in 1 M  $\text{Na}_2\text{SO}_4$ .

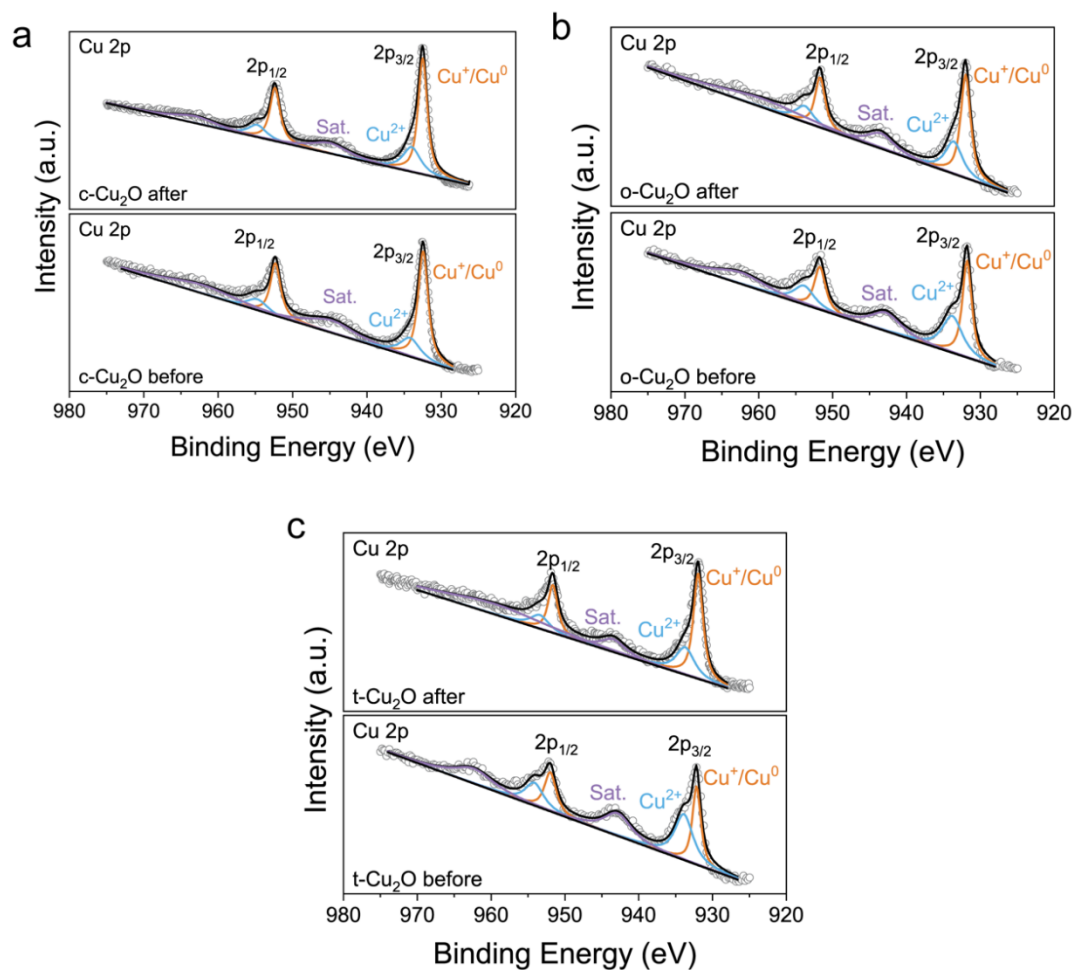

**Figure S7.** X-ray photoelectron spectrum of c-Cu<sub>2</sub>O (a), o-Cu<sub>2</sub>O (b) and t-Cu<sub>2</sub>O (c) before and after HER. Reactions were carried out under 0 V vs. RHE for 30 min in 1 M Na<sub>2</sub>SO<sub>4</sub>.

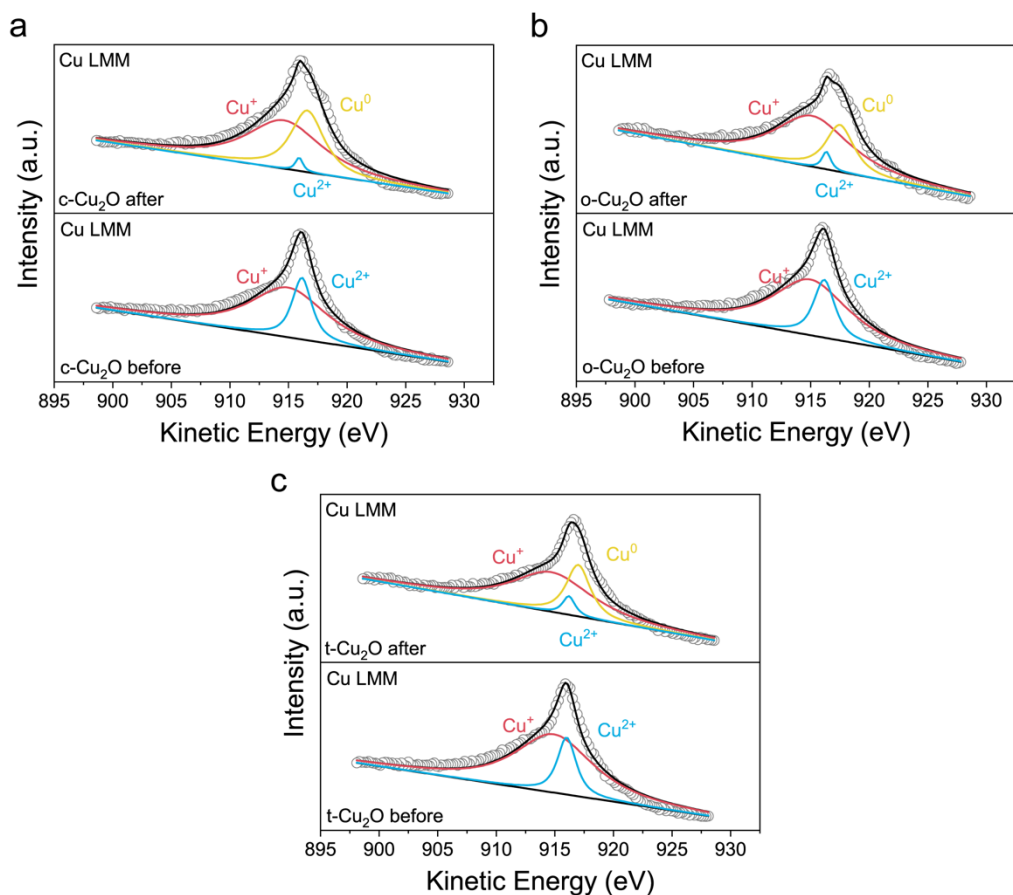

**Figure S8.** Cu LMM Auger electron spectra of c-Cu<sub>2</sub>O (a), o-Cu<sub>2</sub>O (b) and t-Cu<sub>2</sub>O (c) before and after HER. Reactions were carried out under 0 V vs. RHE for 30 min in 1 M Na<sub>2</sub>SO<sub>4</sub>.

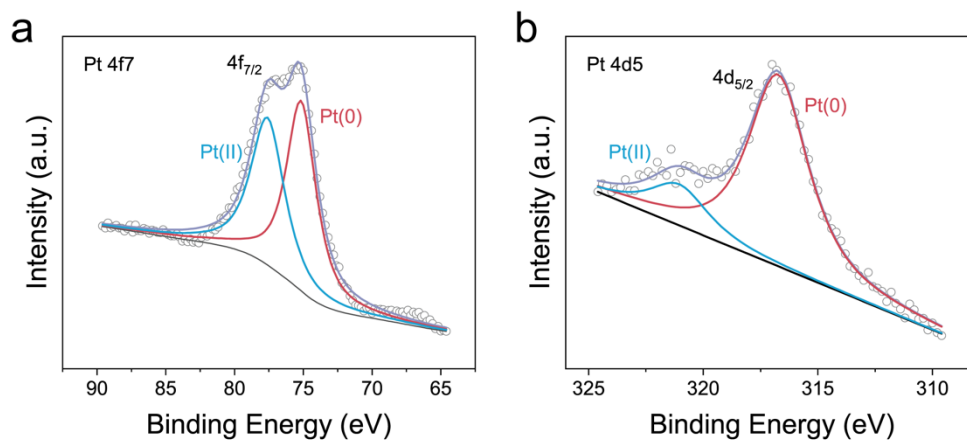

**Figure S9.** XPS spectra after photodeposition of Pt. The peak for Pt(II) can be attributed to the incomplete reduction of H<sub>2</sub>PtCl<sub>6</sub>. Since the precursor of Pt photodeposition is H<sub>2</sub>PtCl<sub>6</sub> with Pt(IV), the presence of Pt(II) still can demonstrate the occurrence of Pt(IV) reduction process by photogenerated electrons.

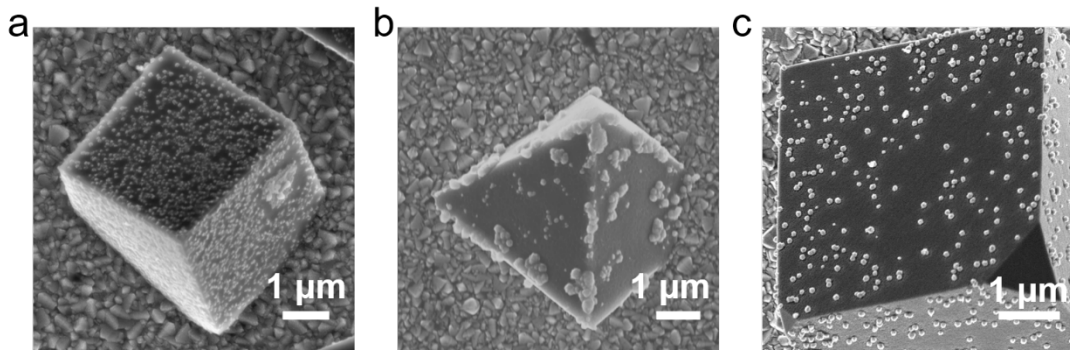

**Figure S10.** SEM images of c-Cu<sub>2</sub>O(a), o-Cu<sub>2</sub>O(b) and t-Cu<sub>2</sub>O(c) after Pt photodeposition.

**Table S1.** Fitting parameters of biexponential PL decay.

| Sample              | Decay lifetime (ns) |          | Amplitude |         | Average lifetime (ns) |
|---------------------|---------------------|----------|-----------|---------|-----------------------|
|                     | $\tau_1$            | $\tau_2$ | $A_1$     | $A_2$   | $\tau$                |
| c-Cu <sub>2</sub> O | 141.0538            | 1618.694 | 0.54753   | 0.32342 | 1428.731              |
| o-Cu <sub>2</sub> O | 87.92246            | 1381.479 | 0.54537   | 0.39306 | 1276.519              |
| t-Cu <sub>2</sub> O | 241.5337            | 1990.808 | 0.59169   | 0.29374 | 1647.265              |
